# Supplementary material
Source: PubMed Central journal article supplement (PMC5076847)
Supplement: 10.1074_M116.728964_jbc.M116.728964-1.pdf [file 10.1074_M116.728964_jbc.M116.728964-1.pdf]

## Supplemental data

## Supplemental Table 1A

**Effect of DUSP1 over-expression and IL1B on inflammatory gene expression.** A549 cells were either not infected or infected with Ad5-DUSP1 or Ad5-Null (control) at a MOI of 10 for 24 h before either no stimulation (NS) or IL1B treatment (1 ng/ml). Cells were harvested after 6 h for real-time PCR analysis of the indicated genes and GAPDH. Data ( $N = 4$ ), normalized to GAPDH, were expressed as a percentage of IL1B-stimulated cells. Data are shown as a heat map in Fig. 1A. Significance relative to IL1B-treated samples, was tested by ANOVA with a Dunnett's post-test. All analyses compare Ad5-DUSP1 to IL1B-treatment and in no case was there any significant effect of the null virus (Ad-null).

| NS       | IL1B | IL1B+Ad5-DUSP1 | IL1B+Ad5-Null | HUGO gene | P value |
|----------|------|----------------|---------------|-----------|---------|
| 0.046798 | 100  | 6.908991       | 96.9073       | PI3       | ***     |
| 4.796774 | 100  | 8.169916       | 89.70302      | TFF1      | ***     |
| 0.430232 | 100  | 14.65387       | 111.7821      | CSF2      | ***     |
| 0.586421 | 100  | 14.932         | 97.17675      | CXCL3     | ***     |
| 5.605619 | 100  | 17.13548       | 97.28996      | PTGS2     | ***     |
| 1.600973 | 100  | 18.73996       | 122.4827      | CXCL5     | ***     |
| 0.240848 | 100  | 21.38961       | 112.7739      | IL8       | ***     |
| 0.100442 | 100  | 36.46495       | 103.4321      | CCL20     | **      |
| 11.8663  | 100  | 53.24498       | 83.30597      | NFKBIA    | ***     |
| 20.7395  | 100  | 79.60745       | 92.86077      | MAP3K8    |         |
| 3.444836 | 100  | 80.86997       | 87.10033      | BIRC3     |         |
| 20.32855 | 100  | 81.52168       | 117.2474      | IFNGR1    |         |
| 1.784336 | 100  | 82.60778       | 116.4463      | CCL2      |         |
| 0.024887 | 100  | 84.04284       | 101.4327      | CCL5      |         |
| 0.115963 | 100  | 93.49159       | 83.47164      | IL6       |         |
| 5.563433 | 100  | 85.41597       | 104.6495      | CCL4      | **      |
| 2.735732 | 100  | 104.5693       | 94.8439       | TNFAIP3   |         |
| 18.02371 | 100  | 134.9119       | 92.17291      | EFNA1     |         |
| 0.698538 | 100  | 142.261        | 89.97934      | ICAM1     | **      |
| 16.0625  | 100  | 150.3968       | 86.24011      | IFIT3iso1 | **      |
| 4.592691 | 100  | 166.6928       | 73.39421      | HELZ2     | *       |
| 7.253281 | 100  | 187.8341       | 115.042       | APOL6     | ***     |
| 2.341992 | 100  | 221.3489       | 93.69964      | CFB       | ***     |
| 2.512993 | 100  | 237.123        | 92.23913      | MX1       | **      |
| 17.80476 | 100  | 248.1079       | 121.9886      | STAT5A    | **      |
| 0.46891  | 100  | 323.0425       | 104.0344      | UBD       | ***     |
| 3.200933 | 100  | 519.4126       | 80.72658      | CMPK2     | ***     |
| 6.335893 | 100  | 801.4803       | 96.54577      | IFIT1     | ***     |
| 22.75595 | 100  | 3430.191       | 123.7676      | TLR2      | ***     |
| 0.689279 | 100  | 3682.19        | 110.7226      | IFIT3iso2 | ***     |
| 0.108521 | 100  | 3984.608       | 92.90648      | CXCL10    | ***     |

**Supplemental Table 1B**

**Effect of IL1B and IRF1-targeting siRNA on inflammatory gene expression.** A549 cells were incubated with LMNA (control) or IRF1-targeting siRNAs prior to either no stimulation (NS) or IL1B treatment (1 ng/ml). Cells were harvested after 6 h for real-time PCR analysis of the indicated genes and GAPDH. Data ( $N = 4$ ), normalized to GAPDH, were expressed as a percentage of IL1B+LMNA siRNA-stimulated cells. Data are shown as a heat map in Fig. 1F. For each IRF1-targeting siRNA, significance relative to IL1B+LMNA siRNA-treated samples, was tested by ANOVA with a Dunnett's post-test.

| NS       | IL1B+LMNAsiRNA | IL1B+IRF1siRNA1 | IL1B+IRF1siRNA2 | Gene      | p value |     |
|----------|----------------|-----------------|-----------------|-----------|---------|-----|
| 11.47971 | 100            | 6055.417        | 4361.353        | CCL5      | ***     | *** |
| 35.32663 | 100            | 2276.193        | 1854.385        | CXCL5     | ***     | *** |
| 0.058747 | 100            | 126.8368        | 168.0418        | CCL20     |         |     |
| 0.144538 | 100            | 115.5344        | 155.3629        | CSF2      |         |     |
| 9.234919 | 100            | 96.67167        | 149.5014        | TFF1      |         |     |
| 0.544161 | 100            | 128.9808        | 145.5629        | TNF       |         |     |
| 17.5615  | 100            | 93.34953        | 135.3033        | EFNA1     |         |     |
| 19.29435 | 100            | 109.7398        | 132.5686        | TLR2      |         |     |
| 0.244158 | 100            | 111.3051        | 125.8073        | ICAM1     |         |     |
| 5.607688 | 100            | 95.07089        | 122.0188        | BIRC3     |         |     |
| 6.396882 | 100            | 91.30604        | 115.4286        | TNFAIP3   |         |     |
| 5.871413 | 100            | 133.0294        | 115.107         | GOS2      |         |     |
| 23.92698 | 100            | 91.31629        | 112.6268        | MAP3K8    |         |     |
| 0.395436 | 100            | 110.514         | 112.5134        | PI3       |         |     |
| 1.197002 | 100            | 94.28899        | 96.69292        | CCL2      |         |     |
| 0.01547  | 100            | 85.99541        | 94.79675        | IL6       |         |     |
| 13.6009  | 100            | 145.3991        | 93.68611        | STAT5A    |         |     |
| 6.818868 | 100            | 87.02939        | 77.79903        | PTGS2     |         |     |
| 2.756561 | 100            | 59.18466        | 68.75256        | CFB       | *       | *   |
| 0.349935 | 100            | 60.33389        | 52.90243        | UBD       | *       | *   |
| 9.547711 | 100            | 39.80418        | 41.1086         | IFIT3iso1 | *       | *   |
| 5.853933 | 100            | 41.83818        | 37.58789        | HELZ2     | *       | **  |
| 6.243556 | 100            | 39.29731        | 29.18912        | APOL6     | ***     | *** |
| 2.018916 | 100            | 36.51087        | 25.29688        | IFIT1     | ***     | *** |
| 0.549646 | 100            | 26.75874        | 24.35754        | MX1       | ***     | *** |
| 0        | 100            | 33.65772        | 16.36983        | CXCL10    | *       | **  |
| 0.884514 | 100            | 28.58642        | 12.78376        | CMPK2     | ***     | *** |
| 0.325002 | 100            | 19.42893        | 9.812231        | IFIT3iso2 | ***     | *** |

**Supplemental Table 2**

**Effect of PS1145 on the mRNA expression of IRF1 and IRF1-dependent genes.** A549 cells were either not stimulated (NS), treated with IL1B (1 ng/ml) or pre-treated with PS1145 at 10  $\mu$ M for 30 min prior to IL1B stimulation. Cells were harvested after 2 h (for IRF1) or 6 h (for IRF1-dependent genes) for real-time PCR analysis of the indicated genes and GAPDH. Data (n = 4) were normalized to GAPDH and presented as means  $\pm$  S.E. Significance, relative to IL1B-treated samples was tested using a paired t test.

| Time (h) | Gene Symbol         | Gene mRNA/GAPDH    |                   |                     |
|----------|---------------------|--------------------|-------------------|---------------------|
|          |                     | NS                 | IL1B              | IL1B + PS1145       |
| 2        | IRF1                | 0.024 $\pm$ 0.058  | 286.3 $\pm$ 95    | 129.8 $\pm$ 60*     |
| 6        | APOL6               | 0.16 $\pm$ 0.033   | 1.3 $\pm$ 0.046   | 0.31 $\pm$ 0.041*** |
|          | CFB                 | 0.071 $\pm$ 0.022  | 1.2 $\pm$ 0.072   | 0.24 $\pm$ 0.012*** |
|          | CMPK2               | 0.064 $\pm$ 0.029  | 1.02 $\pm$ 0.14   | 0.14 $\pm$ 0.015*** |
|          | CXCL10              | 0.027 $\pm$ 0.028  | 0.76 $\pm$ 0.16   | 0.041 $\pm$ 0.010** |
|          | HELZ2               | 0.044 $\pm$ 0.011  | 3.2 $\pm$ 0.67    | 0.22 $\pm$ 0.026**  |
|          | IFIT1               | 0.013 $\pm$ 0.0081 | 7.9 $\pm$ 1.4     | 0.11 $\pm$ 0.040*   |
|          | IFIT3 iso1          | 0.14 $\pm$ 0.012   | 1.0 $\pm$ 0.10    | 0.27 $\pm$ 0.025**  |
|          | IFIT3 iso2          | 0.035 $\pm$ 0.021  | 0.92 $\pm$ 0.054  | 0.16 $\pm$ 0.020*** |
|          | MX1                 | 0.011 $\pm$ 0.0091 | 4.7 $\pm$ 1.5     | 0.043 $\pm$ 0.016** |
| UBD      | 0.0087 $\pm$ 0.0060 | 3.9 $\pm$ 1.0      | 0.36 $\pm$ 0.13** |                     |

**Supplemental Table 3**

**(A) Primers used for PCR analysis**

Forward (F) and reverse (R) primer sequences (5'-3') are shown in addition to the accession number for each gene. For genes with more than one splice variant, primers were designed to pick up all variants, with the exception of IFIT3 for which two sets of primers were designed. All primers were designed using Primer Express software (Applied Biosystems) and were synthesised by the DNA synthesis lab at the University of Calgary.

| Target gene | Accession Number               | Primer Sequences                                      |
|-------------|--------------------------------|-------------------------------------------------------|
| APOL6       | NM_030641.3                    | F: CCCTGCCAGACCAGGGGACC<br>R: GGAGCGTCATCCTCATCCCTTGC |
| BCL2A1      | NM_001114735.1;<br>NM_004049.3 | F: CCCC GGATGTGGATACCTA<br>R: CTAGAAAAGTCATCCAGCCAGA  |
| BIRC3       | NM_001165.3;<br>NM_182962.1    | F: CCGTCAAGTTC AAGCCAGTTACCC<br>R: AGCCATTTCACGGCAGCA |
| CCL2        | NM_002982.3                    | F: GCTCGCTCAGCCAGATGCAA<br>R: TCCTGAACCCACTTCTGCTTG   |
| CCL4        | NM_002984.3                    | F: CTTCTCGCAACTTTGTGGT<br>R: GCTTGCTTCTTTTGGTTTG      |

*Negative regulation of IRF1 by MAPKs*

|             |                                                                                                                                                  |                                                               |
|-------------|--------------------------------------------------------------------------------------------------------------------------------------------------|---------------------------------------------------------------|
| CCL5        | NM_002985.2                                                                                                                                      | F: TGCCTACATTGCCCGCCAC<br>R: GGGTTGGCACACACTTGGCG             |
| CCL20       | NM_001130046.1;<br>NM_004591.2                                                                                                                   | F: TGACATCAATGCTATCATCTTTTACA<br>R: TTTGCGCACACAGACAACCTTT    |
| CFB         | NM_001710.5                                                                                                                                      | F: ATGCCACATACCCCAAATTTGGGT<br>R: GTTAGTCCCTGACTTCAACTTGTGGT  |
| CMPK2       | NM_207315.2                                                                                                                                      | F: GCCGGGGCATGGAGAAGACC<br>R: TGGAGGGGCTGGCATCAACCA           |
| CSF2        | NM_000758.2                                                                                                                                      | F: CCATGATGGCCAGCCACTACAAGC<br>R: ACTGGCTCCAGCAGTCAAAGG       |
| CXCL1       | NM_001511.2                                                                                                                                      | F: TCAATCCTGCATCCCCCA<br>R: CATAGAATCTTCAAACTAATGAATAAAT      |
| CXCL3       | NM_002090.2                                                                                                                                      | F: TCATCGAAAAGATACTGAACAAGGG<br>R: GAAGTGTCAATGATACGCTGATAAGC |
| CXCL5       | NM_002994.4                                                                                                                                      | F: CCCAAAATGATCAGTAATCTGCAA<br>R: CAAATTTCTTCCCGTTCTTCA       |
| CXCL10      | NM_139089.1                                                                                                                                      | F: TTCCTGCAAGCCAATTTTGTCT<br>R: TCTTCTCACCCCTTCTTTTTTCATTGT   |
| EFNA1       | NM_004428.2;<br>NM_182685.1                                                                                                                      | F: TCACAGTCCTCAGGCCCATGACA<br>R: GTGGGGCAGCACTGTGACCG         |
| FAM129A     | NM_052966.2                                                                                                                                      | F: GCTGGACGAGGGCAAGTGCG<br>R: AGGCGCCAATGGTGGCTTGG            |
| GAPDH       | NM_002046                                                                                                                                        | F: TTCACCACCATGGAGAAGGC<br>R: AGGAGGCATTGCTGATGATCT           |
| GOS2        | NM_015714.3                                                                                                                                      | F: GCGCCGTGCCACTAAGGTCA<br>R: CACGCTGCCAGCACGTACA             |
| ICAM-1      | NM_000201.2                                                                                                                                      | F: TGCCCTGATGGGCAGTCAACA<br>R: GCAGCGTAGGGTAAGGTTCTTG         |
| IFIT1       | NM_001548.3                                                                                                                                      | F: AACCTGCAGAACGGCTG<br>R: TGAAAGTGACATCTCAATTGCTCC           |
| IFIT3iso1   | NM_001549.4                                                                                                                                      | F: GCGTGCCCTACTCTCCCACC<br>R: AGCTGTGGAAGGATTTTCTCCAGGG       |
| IFIT3iso2   | NM_001031683.2                                                                                                                                   | F: TCAGAACTGCAGGGAAACAGCCA<br>R: AGCTGTGGAAGGATTTTCTCCAGGG    |
| IFNGR1      | NM_000416.2                                                                                                                                      | F: GAATTTGCTGTATGCCGAGATG<br>R: TGATTTGCTTCTCCTCCTTTCTG       |
| IKBa/NFKBIA | NC_000014.9                                                                                                                                      | F: TGGTGCCTTGGGTGCTGAT<br>R: GGCAGTCCGGCCATTACA               |
| IL6         | NM_000600.3                                                                                                                                      | F: CCTGAGAAAGGAGACATGTAACAAGA<br>R: GGAAGGTTCAAGTTGTTTTCTGC   |
| IL8         | NM_000584.2                                                                                                                                      | F: GCAGCTCTGTGTGAAGGTGC<br>R: AAAGGTTTGGAGTATGTCTTTATGCA      |
| IL32        | NM_001012631.1;<br>NM_004221.4;<br>NM_001012718.1;<br>NM_001012636.1;<br>NM_001012635.1;<br>NM_001012634.1;<br>NM_001012632.1;<br>NM_001012633.1 | F: GCAGCACCCAGAGCTCACTCC<br>R: AGGCTCCTCGGTTGCGGGAT           |

|         |                                                   |                                                                                                                                                     |
|---------|---------------------------------------------------|-----------------------------------------------------------------------------------------------------------------------------------------------------|
| IRF1    | NM_002198.2                                       | Cytoplasmic IRF1:<br>F: CTCACTGCAGCCCCCTGCGTC<br>R: TGGGCATGTTGGCTCTGCTGC<br>Unspliced nuclear IRF1:<br>F: GCGACCGCCGAATCG<br>R: TTCGACCCCCCACTTCCT |
| ISG20   | NM_002201.4                                       | F: TCCCTGCGGGTGCTGAGTGA<br>R: GCTCCATCGTTGCCCTCGCA                                                                                                  |
| LAMB3   | NM_000228.2;<br>NM_001127641.1;<br>NM_001017402.1 | F: CAGCCAGGCTCCCCAACGTG<br>R: GGCTCGGCTCCTGGCTTCCT                                                                                                  |
| MAP3K8  | NM_005204.3<br>NM_001244134.1                     | F: CGAAGAAAAGAATGGCGTGTA<br>R: AGCCTGGATTTCCACATCAGA                                                                                                |
| MX1     | NM_001144925.1;<br>NM_002462.3                    | F: GGCAGCGGGATCGTGACCAG<br>R: CCTTCCCCGGCGATGGCATT                                                                                                  |
| NFKB2   | NM_001077493.1;<br>NM_002502.3;<br>NM_001077494.1 | F: AACCCAAGGAGCCAGCCCCA<br>R: CAGCCATATCGAAATCGGAAG                                                                                                 |
| NFKBIZ  | NM_001005474.1;<br>NM_031419.2                    | F: GGCTTCTGGCCAAGCTGTGGAT<br>R: TCCCCGGGCGTTGGTGTGTTG                                                                                               |
| OLR1    | NM_002543.3                                       | F: TGGTGCTGGGCATGCAATTATCCC<br>R: GCCGGGCTGAGATCTGTCCCT                                                                                             |
| PI3     | NM_002638.3                                       | F: AGCCTGGCTCCTGCCCCATT<br>R: GCAAGGACCGGCTCCCTCTCA                                                                                                 |
| PRIC285 | NM_001037335.2;<br>NM_033405.3                    | F: ACGGTCATTCAGGGCCCACCA<br>R: GGCCTCAGCCTGCTCACTGT                                                                                                 |
| PTGS2   | NM_000963.2                                       | F: GCTGGGCCATGGGGTGGACT<br>R: CCTGCCCCACAGCAAACCGT                                                                                                  |
| SOD2    | NM_000636.2;<br>NM_001024465.1;<br>NM_001024466.1 | F: CGTGGCTGTGGTGGCTTCGG<br>R: CCTGCTGGTGCCGCACACT                                                                                                   |
| TFF1    | NM_003225.2                                       | F: TCTGCGCCCTGGTCCTGGTG<br>R: GCACACTGGGAGGGCGTGAC                                                                                                  |
| TLR2    | NM_003264.3                                       | F: GCTGCTCGGCGTTCTCTC<br>R: AAGCAGTGAAAGAGCAATGGG                                                                                                   |
| TNF     | NM_000594.2                                       | Cytoplasmic TNF:<br>F: GTGATCGGCCCCCAGAGGGAA<br>R: TGGAGCTGCCCTCAGCTTGA                                                                             |
| TNFAIP3 | NM_006290.2                                       | F: AGGCGCTGTTTCAGCACGCTC<br>R: CGGGCCATGGGTGTGTCTGT                                                                                                 |
| UBD     | NM_006398.3                                       | F: GGTTCCTGGCCCCTTGTCTGCAG<br>R: ACGCTGTCATATGGGTTGGCATCA                                                                                           |
| U6      | NR_004394.1                                       | F: AATTGGAACGATACAGAGAAGATTAGC<br>R: GGAACGCTTCACGAATTTGC                                                                                           |

**(B) Sequences for siRNA targeting**

IRF-1 siRNA was supplied by Invitrogen, Canada and others were supplied by Qiagen, Canada.

| Target name   | Sequence                         |
|---------------|----------------------------------|
| LMNA siRNA    | 5'-CTGTACTATCCTGTAAATATA-3'      |
| DUSP1 siRNA 1 | 5'-TAGCGTCAAGACATTTGCTGA-3'      |
| DUSP1 siRNA 2 | 5'-AACTGGACTTCCAGAAGAACA-3'      |
| IRF1 siRNA 1  | 5'-GGGACAUCAACAAGGAUGCCUGUU U-3' |
| IRF1 siRNA 2  | 5'-CGGACAGCACCAGTGATCTGTACA A-3' |

**(C) Primers used for ChIP PCR analysis**

Forward (F) and reverse (R) primer sequences (5'-3') are shown in addition to the accession number for each gene. Primer location for each gene was selected based on the presence of IRF1 binding site as shown in the custom tracks of UCSC genome browser database. All primers were designed using primer designing software (Integrated DNA technologies) and were synthesised by the DNA synthesis lab at the University of Calgary.

| Target gene | Accession Number | Primer Sequences                                                   |
|-------------|------------------|--------------------------------------------------------------------|
| CMPK2       | NM_207315.2      | F: GCCAGCGGAAACGAAAG<br>R: AGGAGGAGAGGCCGGAA                       |
| CXCL10      | NC_000004.12     | F: ATTTCCCTCTGCTCCTCTTT<br>R: GAATGGATTGCAACCTTTGTTT               |
| IFIT1       | NM_001548.3      | F: CACCATTGGCTGCTGTTTAG<br>R: CTCCTCTGAGATCTGGCTATTC               |
| IFIT3       | NC_000010.11     | F: GTGGAAACCTCTTCAGCATTTG<br>R: CAGAGAAGCAGGGACTATTTACC            |
| hMYOD1(A)   | NC_000011.10     | F: TGCAGGAGATGAAATACTAAGCAAGTA<br>R: AGATTGGAAACTGAGGACTTTAGTTAGAG |
| hOLIG3      | NC_000006.12     | F: GGCAAGGACAGAGACAATCATA<br>R: CTCTGTGTTCTCGCTTTGGA               |
| hMYOG       | NC_000001.11     | F: CCAATGAGACTGAGTGGGTTTTTC<br>R: TCACCAGAGAAGACTGCTTTGC           |
